# Supplementary material for: ElectroPen: An ultra-low–cost, electricity-free, portable electroporator
Source: PubMed Central journal article supplement (PMC6953602; doi:10.1371/journal.pbio.3000589), 2020-01-10
Supplement: pbio.3000589.s021.pdf [file pbio.3000589.s021.pdf]

**Supplementary Information**  
**ElectroPen: An ultralow-cost, electricity-free, portable electroporator**

---

| <b>Device</b>                                   | <b>Additional Supplies</b>       | <b>Cost<sup>†</sup></b> | <b>Electricity</b> | <b>Weight</b> |
|-------------------------------------------------|----------------------------------|-------------------------|--------------------|---------------|
| BioRad Micropulser Electroporator               | Commercial cuvettes*             | \$2,399.00              | Yes                | 2.9kg         |
| Eppendorf Eporator                              | Commercial cuvettes*             | \$2,619.00              | Yes                | 3.2kg         |
| BioRad Gene Pulse Cell Microbial Electroporator | Commercial cuvettes*             | \$6,875.00              | Yes                | 6.6kg         |
| <b>ElectroPen</b>                               | <b>Low-cost, custom cuvettes</b> | <b>\$0.23</b>           | <b>No</b>          | <b>13g</b>    |

TABLE I. Comparison between standard commercial electroporators and the ElectroPen. The listed electroporators reflect common equipment utilized in labs. The ElectroPen reflects a fraction of the cost of its industrial equivalent, while not requiring access to electricity and weighing magnitudes less.\*0.1/0.2 cm Gap Industrial Electroporation Cuvettes. <sup>†</sup> cost includes only the device.
